# Supplementary material for: Immunogold labeling and X-ray fluorescence microscopy reveal enrichment ratios of Cu and Zn, metabolism of APP and amyloid-β plaque formation in a mouse model of Alzheimer's disease
Source: Royal Society of Chemistry journal article supplement (doi:10.1039/c2mt20056b), 2012-01-01
Supplement: c2mt20056b.pdf [file c2mt20056b.pdf]

## Supplementary Information

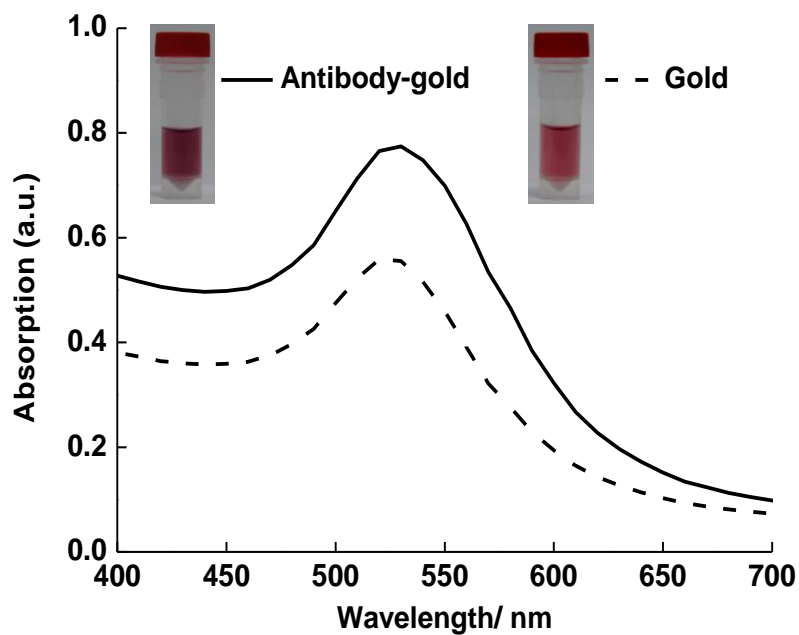

**Figure S1** The UV-Vis absorption of gold nanoparticles. Solid line: gold nanoparticles conjugated with second antibody; dash line: goat-anti-rabbit IgG gold nanoparticles.

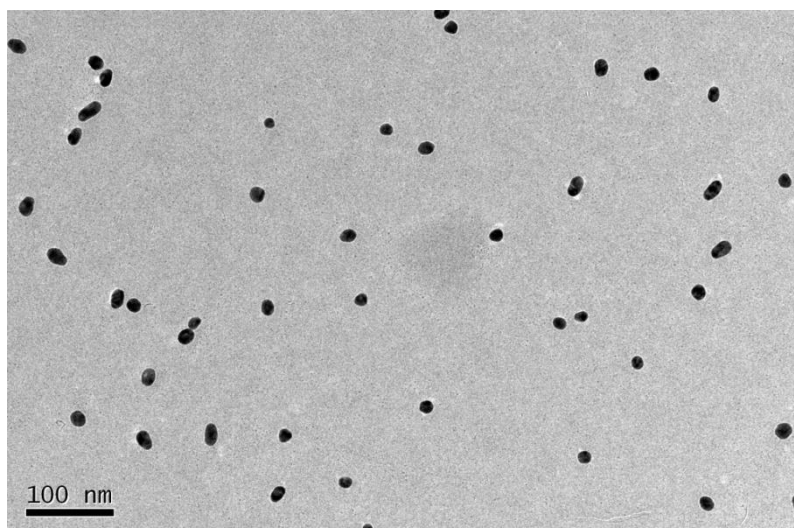

**Figure S2** TEM image of goat-anti-rabbit IgG gold nanoparticles.

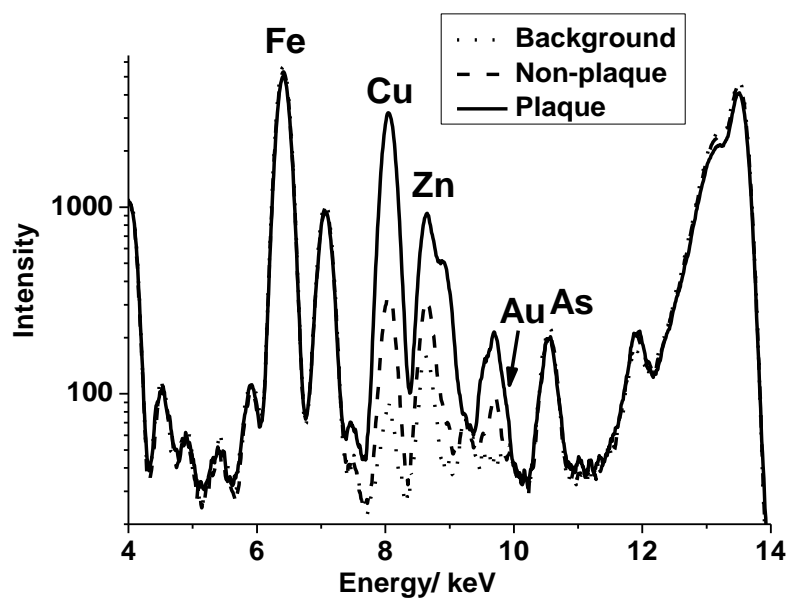

**Figure S3** Typical SR- $\mu$ XRF spectrum of metals in the amyloid plaque of a 16-month-old AD brain.
